# Supplementary material for: Different roles of urinary light chains and serum light chains as potential biomarkers for monitoring disease activity in systemic lupus erythematosus
Source: PeerJ. 2022 May 17;10:e13385. doi: 10.7717/peerj.13385 (PMC9121880; doi:10.7717/peerj.13385)
Supplement: Supplemental Information 2 [file peerj-10-13385-s002.xlsx]

## Sheet: urine light chains
Group	Patient ID	gender	age(year)	SLEDAI-2000	disease activity	duration(year)	urine kappa light chains(mg/l)	urine lambda light chains(mg/l)
active	A001	female	29	9	mild	5	22.5	4.4
active	A002	female	29	8	mild	7	7.16	3.94
active	A003	female	50	7	mild	8	7.16	3.94
active	A004	female	32	10	moderate	15	446	325
active	A005	female	29	11	moderate	3	7.16	3.94
active	A006	female	44	10	moderate	0.33	7.16	3.94
active	A007	female	61	10	moderate	30	18.6	7.55
active	A008	female	39	11	moderate	0.417	19.2	5.42
active	A009	female	43	13	moderate	0.17	24.7	14.7
active	A01	male	24	5	mild	0.05	40.2	11.9
active	A010	female	38	12	moderate	0.17	8.5	3.94
active	A011	female	47	15	severe	1	16.2	4.8
active	A012	female	33	15	severe	7	7.16	3.94
active	A013	female	45	15	severe	1	151	99
active	A014	female	52	14	moderate	3	10.7	3.94
active	A015	female	49	12	moderate	9	7.9	3.94
active	A016	female	59	16	severe	5	19.8	10.9
active	A02	female	58	14	moderate	26	7.16	3.94
active	A03	female	31	24	severe	0.5	223	83.9
active	A04	female	57	9	mild	7	12.6	3.94
active	A05	female	40	11	moderate	2	18.1	7.45
active	A06	male	32	14	moderate	5	506	260
active	A07	female	18	10	moderate	2	51.1	10.9
active	A08	female	23	6	mild	4	7.16	3.94
active	A09	female	30	20	severe	0.019	84.9	49.4
active	A10	female	50	30	severe	0.019	120	48.5
active	A11	female	35	5	mild	2	7.16	3.94
active	A12	female	44	8	mild	1	12.1	3.94
active	A13	female	46	5	mild	18	7.16	3.94
active	A14	female	56	18	severe	0.17	103	67.2
active	A15	female	61	20	severe	0.75	245	189
stable	B001	female	38	1	None	0.42	14.4	4.28
stable	B002	female	47	2	None	20	7.16	3.94
stable	B003	female	51	1	None	0.75	7.16	3.94
stable	B004	female	22	3	None	6	7.16	3.94
stable	B005	female	50	4	None	1	11.5	3.94
stable	B006	female	35	2	None	0.25	7.16	3.94
stable	B007	female	26	2	None	0.42	15.7	5.06
stable	B008	female	45	1	None	16	7.16	3.94
stable	B009	female	74	0	None	5	28.9	11.1
stable	B01	female	25	0	None	0.25	87.2	19.7
stable	B010	female	47	1	None	3	7.16	3.94
stable	B011	female	65	2	None	3	7.16	3.94
stable	B012	female	39	1	None	6	7.16	3.94
stable	B013	female	38	1	None	3	41.8	22.2
stable	B014	female	32	1	None	4.63	7.16	3.94
stable	B02	female	44	2	None	23	7.16	3.94
stable	B03	female	53	0	None	14	7.16	3.94
stable	B04	female	48	3	None	1	33.9	5.03
stable	B05	female	48	3	None	4	24.1	13.9
stable	B06	female	33	2	None	2	7.44	3.94
stable	B07	female	35	2	None	1	7.16	3.94
stable	B08	female	32	4	None	0.83	10.5	3.94
stable	B10	female	56	1	None	4	7.16	3.94
stable	B11	female	64	0	None	4	7.16	3.94
stable	B12	male	32	0	None	5	7.6	3.94
stable	B13	female	21	0	None	3	7.16	3.94
stable	B15	female	38	4	None	0.83	7.16	3.94
stable	B16	female	29	4	None	12	7.16	3.94
stable	B19	female	52	0	None	1	7.16	3.94
